# Supplementary material for: Establishment of appropriate glaucoma models using dexamethasone or TGFβ2 treated three-dimension (3D) cultured human trabecular meshwork (HTM) cells
Source: PubMed Central journal article supplement (PMC8481525; doi:10.1038/s41598-021-98766-3), 2021-09-29
Supplement: 41598_2021_98766_MOESM1_ESM.pdf [file 41598_2021_98766_MOESM1_ESM.pdf]

A

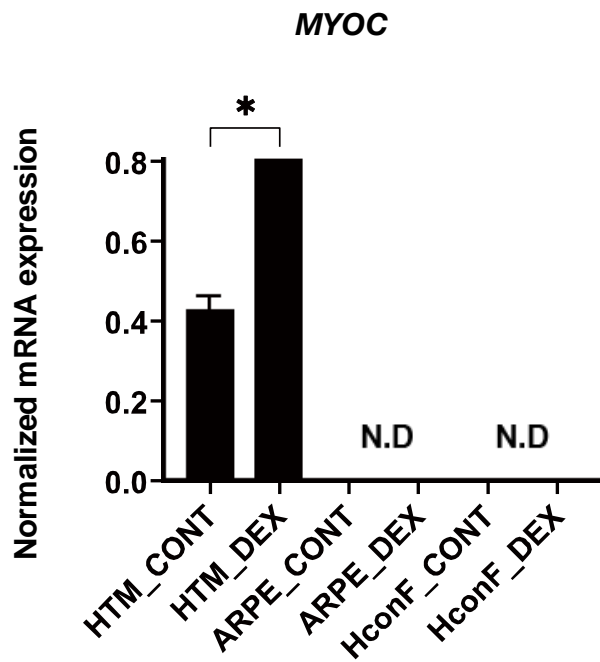

B

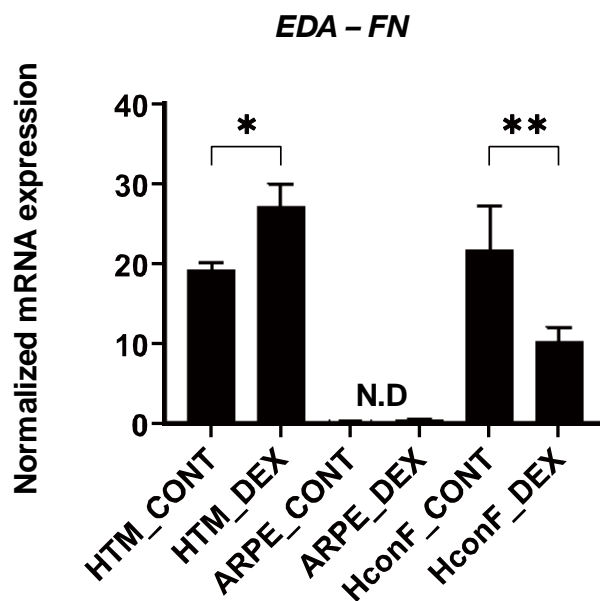

Supplemental Figure 1 mRNA expression of myocilin or EDA fibronectin in 2D cultured HTM, human conjunctival fibroblast (HconF) or human retinal pigment epithelium (HRPE).

In the absence or presence of 250 nM DEX, 2D cultured HTM, HconF or

HRPE at Day 6 were subjected to qPCR analysis to estimate the expression of mRNA of myocilin (*MYOC*, panel A) or EDA fibronectin (*EDA-FN*, panel B). All experiments were performed in duplicate using fresh preparations. Data are presented as the arithmetic mean  $\pm$  standard error of the mean (SEM). \*  $P < 0.05$ , \*\*  $P < 0.01$  (ANOVA followed by a Tukey's multiple comparison test).

|                    |         | Sequence                                              | Exon Location | RefSeqNumber |
|--------------------|---------|-------------------------------------------------------|---------------|--------------|
| human RPLP0        | Probe   | 5'-/56-FAM/CCCTGTCTT/ZEN/CCCTGGGCATCAC/3IABkFQ/-3'    | 2-3           | NM_001002    |
|                    | Primer2 | 5'-TCGTCTTTAAACCCCTGCGTG-3'                           |               |              |
|                    | Primer1 | 5'-TGCTGCTCCACAATGAAAC-3'                             |               |              |
| human COL1A1       | Probe   | 5'-/56-FAM/TGCAGGGCC/ZEN/AAGACGAAGACATC/3IABkFQ/-3'   | 1-2           | NM_000088    |
|                    | Primer2 | 5'-GACATGTTGAGCTTTGTGGAC-3'                           |               |              |
|                    | Primer1 | 5'-TTCTGTACGCAGGTGATTGG-3'                            |               |              |
| human COL4A1       | Probe   | 5'-/56-FAM/TCATACAGA/ZEN/CTTGGCAGCGGCT/3IABkFQ/-3'    | 51-52         | NM_001845    |
|                    | Primer2 | 5'-AGAGAGGAGCGAGATGTTCA-3'                            |               |              |
|                    | Primer1 | 5'-TGAGTCAGGCTTCATTATGTTCT-3'                         |               |              |
| human COL6A1       | Primer2 | 5'-CCTCGTGGACAAAGTCAAGT-3'                            | 2-3           | NM_001848    |
|                    | Primer1 | 5'-GTGAGGCCTTGGATGATCTC-3'                            |               |              |
| human FN1          | Primer2 | 5'-CGTCCTAAAGACTCCATGATCTG-3'                         | 3-4           | NM_212482    |
|                    | Primer1 | 5'-ACCAATCTTGTAGGACTGACC-3'                           |               |              |
| human $\alpha$ SMA | Probe   | 5'-/56-FAM/AGACCCTGT/ZEN/TCCAGCCATCCTTC/3IABkFQ/-3'   | 8-9           | NM_001613    |
|                    | Primer2 | 5'-AGAGTTACGAGTTGCCTGATG-3'                           |               |              |
|                    | Primer1 | 5'-CTGTTGTAGGTGGTTTCATGGA-3'                          |               |              |
| human TIMP1        | Probe   | 5'-/56-FAM/TCAACCAGA/ZEN/CCACCTTATACCAGCG/3IABkFQ/-3' | 2-4           | NM_003254    |
|                    | Primer2 | 5'-CCTTCTGCAATTCCGACCT-3'                             |               |              |
|                    | Primer1 | 5'-GCTTGGAACCCCTTATACATCTTG-3'                        |               |              |
| human TIMP2        | Probe   | 5'-/56-FAM/TCTCATTGC/ZEN/AGGAAAGGCCGAGG/3IABkFQ/-3'   | 3-4           | NM_003255    |
|                    | Primer2 | 5'-GACGTTGGAGGAAAGAAGGA-3'                            |               |              |
|                    | Primer1 | 5'-TGTGGTTCAGGCTCTTCTTC-3'                            |               |              |
| human TIMP3        | Probe   | 5'-/56-FAM/CCCTCCTTTA/ZEN/CCAGCTTCTTCCCAC/3IABkFQ/-3' | 1-3           | NM_000362    |
|                    | Primer2 | 5'-CCTTCTGCAACTCCGACATC-3'                            |               |              |
|                    | Primer1 | 5'-CGGTACATTTTCATCTGCTTGA-3'                          |               |              |
| human TIMP4        | Probe   | 5'-/56-FAM/ACTGAGGAC/ZEN/CTGACCAGTCAAGAGA/3IABkFQ/-3' | 3-4           | NM_003256    |
|                    | Primer2 | 5'-GGTTTGAGAAAGTCAAGGATGTTTC-3'                       |               |              |
|                    | Primer1 | 5'-GTTGCACAGATGGATGAAGAC-3'                           |               |              |
| human MMP2         | Primer2 | 5'-TCCACCACCTACAACCTTTGAG-3'                          | 6-7           | NM_004530    |
|                    | Primer1 | 5'-GTGCAGCTGTCATAGGATGT-3'                            |               |              |
| human MMP9         | Primer2 | 5'-ACATCGTCATCCAGTTTGGTG-3'                           | 3-4           | NM_004994    |
|                    | Primer1 | 5'-CGTCGAAATGGGCGTCT-3'                               |               |              |
| human MMP14        | Primer2 | 5'-TTCGCCGACTAAGCAGAAG-3'                             | 1-1           | NM_004995    |
|                    | Primer1 | 5'-CTTGAATCCTAGACCGCTGT-3'                            |               |              |
| human MYOC         | Probe   | 5'-/56-FAM/CCTCTCCAC/ZEN/TCCTGAGATAGCCAGA/3IABkFQ/-3' |               |              |
|                    | Primer2 | 5'-CTGCTTCCCGAATTTTGAAGG-3'                           |               |              |
|                    | Primer1 | 5'-ATCCACACACCATACTTGCC-3'                            |               |              |

### Supplemental Table 1 Sequences of primers of qPCR

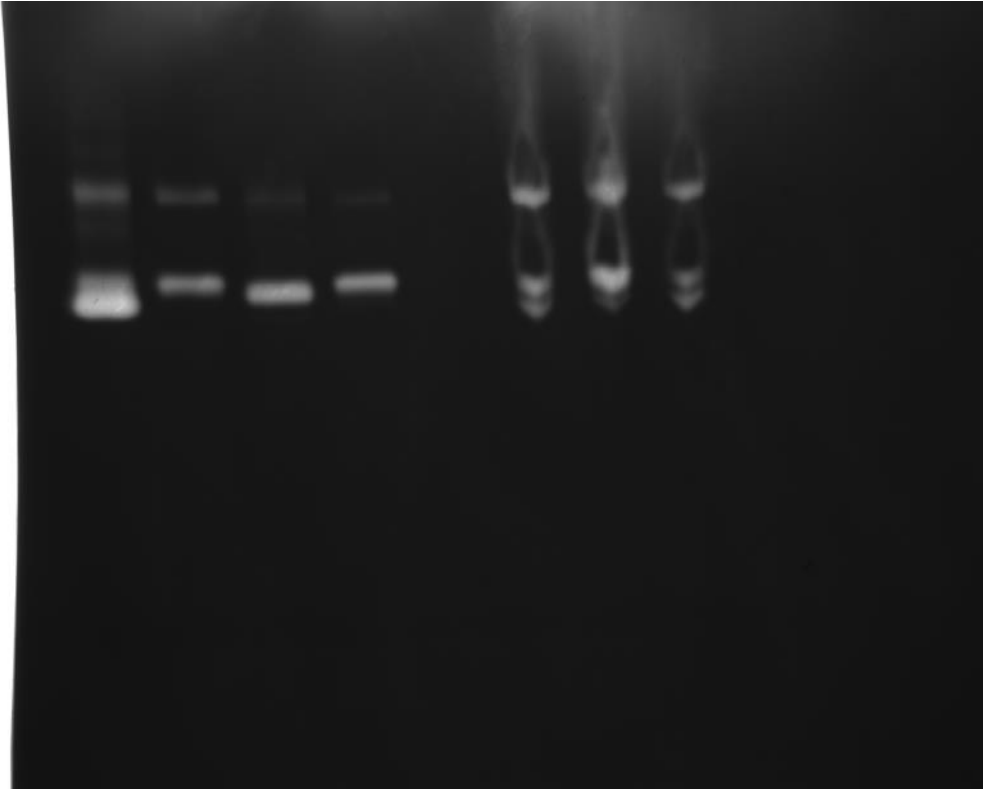

**Supplemental information for zymography**

Fig. 9 is the monochrome inversion image obtained from original zymography gel attached here.

# Product Datasheet

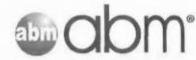

## Immortalized Human Primary Trabecular Meshwork Cells - SV40

Cat. No.  
T0371

Quantity  
1x10<sup>6</sup> cells / 1.0 ml

|                                    |                                                                                               |
|------------------------------------|-----------------------------------------------------------------------------------------------|
| <b>Organism</b>                    | Homo sapiens                                                                                  |
| <b>Source Organ</b>                | Juxtacanalicular and corneoscleral regions of human eye                                       |
| <b>BioSafety Level</b>             | II                                                                                            |
| <b>Growth Properties</b>           | Adherent                                                                                      |
| <b>Morphology</b>                  | Polygonal                                                                                     |
| <b>Recommended Seeding Density</b> | 10,000 - 20,000 cells/cm <sup>2</sup>                                                         |
| <b>Population Doubling</b>         | 18-25 hours                                                                                   |
| <b>Immortalization Method</b>      | Serial passaging and transduction with recombinant lentiviruses carrying SV40 Large T antigen |

**Description**  
Immortalized Human Primary Trabecular Meshwork Cells - SV40 were derived from the normal juxtacanalicular and corneoscleral tissue regions of the human eye, and were immortalized with SV40. Recommended for use in research for glaucoma and studies involving trabecular meshwork functions.

**Applications**  
For Research Use Only

**Propagation Requirements**  
Use of PriCoat™ T25 Flasks (G299) or Applied Cell Extracellular Matrix (G422) is required for cell adhesion to the culture vessels. Grow cells in ECM-coated culture vessels with the following conditions. The base medium for this cell line is Prigrow III medium available at abm, Cat. No. TM003. To make the complete growth medium, add the following components to the base medium: fetal bovine serum (TM999)\* to a final concentration of 10% and Penicillin/Streptomycin Solution (G255) to a final concentration of 1%. Carbon dioxide (CO<sub>2</sub>): 5%, Temperature: 37.0°C.

\* abm does not recommend to use heat-inactivated FBS for cell culture unless specified otherwise.

### Procedure Overview

コスモバイオ株式会社 COSMO BIO CO., LTD. 研究用 X69

|              |                                        |                               |
|--------------|----------------------------------------|-------------------------------|
| 品名 / Desc.   | Immortalized Trabecular Meshwork Cells |                               |
| メーカー / -     | APB Applied Biological Materials Inc.  |                               |
| 品番 /         | T0371-C-ACADEMIC                       |                               |
| サイズ / Size   | 1 EACH                                 | 1x10 <sup>6</sup> cells / 1.0 |
| ロット / Lot    | 0057835530001                          |                               |
| 法令区分 / -     | カルタヘナ                                  |                               |
| 貯蔵温度 / Store | 液窒 [LN2]                               |                               |
| 輸送条件 / Trans | ドライアイス多                                |                               |

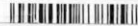

2000001838457

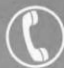

1-866-757-2414 (Toll Free)  
604-247-2416 (Local)

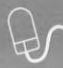

Order: order@abmGood.com  
Website: www.abmGood.com

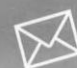

Applied Biological Materials Inc.  
8 - 13520 Crestwood Place,  
Richmond, BC, CANADA V6V 2G2

Supplemental information for datasheet1 of immortalized HTM cell from company.

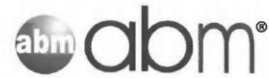

## Certificate of Analysis

### SUBMITTED BY:

Quality Control Personnel: 0017  
Quality Assurance Personnel: 0130

### Applied Biological Materials Inc.

1-3671 Viking Way,  
Richmond, BC, CANADA  
V6V 2J5

### Product Description

**Product Name:** Immortalized Human Primary Trabecular Meshwork Cells – SV40  
**Cat. Number:** T0371–C  
**Lot Number:** 0057835530001  
**Date of Manufacture:** 10/ 2018  
**Species:** *Homo sapiens*  
**Source Organ:** Eye  
**Quantity:** 1 vial (Cryopreserved)  
**Passage Number:** 12  
**Cell Count:**  $1.11 \times 10^6$  Cells/ml  
**Viability:** > 80%  
**Population Doubling Time:** 18-25 hours  
**Recommended Seeding Density:** 10,000 – 20,000 cells/cm<sup>2</sup>  
**Storage Conditions:** -180°C

### Specifications

| Test       | Method | Results      |
|------------|--------|--------------|
| Sterility  | ****   | Pass         |
| Mycoplasma | PCR    | Not Detected |

Approved By:

  
Vidhu Sharma

Approved Date: October 12, 2018

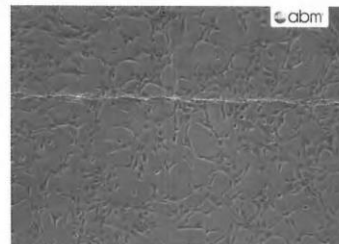

T0371 – Immortalized Human Primary Trabecular Meshwork Cells – SV40

This product is for research use only and is not intended for therapeutic or diagnostic applications.  
Please contact a technical service representative for more information.

**Supplemental information for datasheet2 of immortalized HTM cell from company.**
